# Supplementary material
Source: PubMed Central journal article supplement (PMC4335709)
Supplement: NIHMS637755-supplement-1.pdf [file NIHMS637755-supplement-1.pdf]

# Supplemental Data 1

**a** ALVAC/HPV+gp120

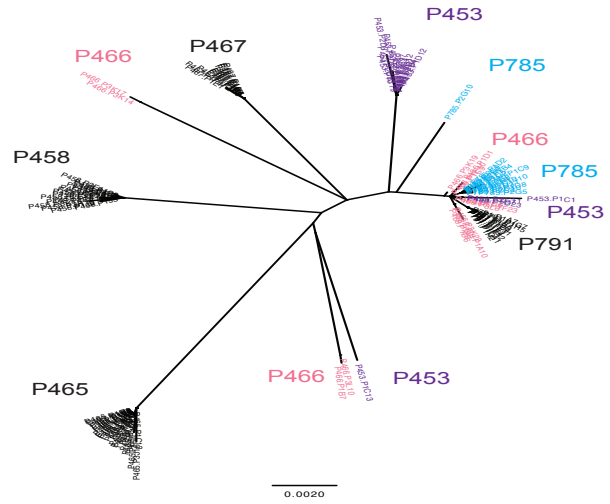

**b** HPV+gp120

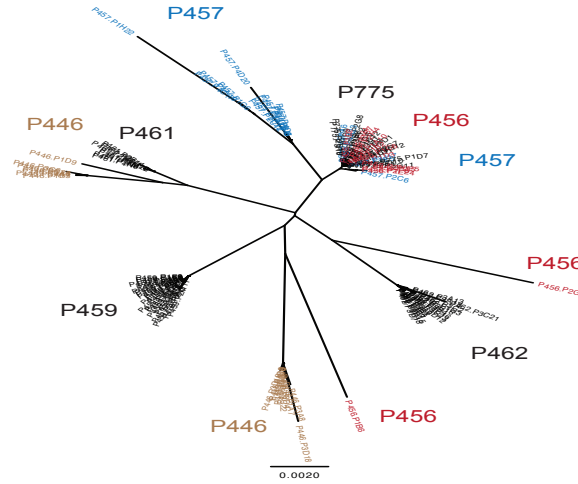

**c** Control

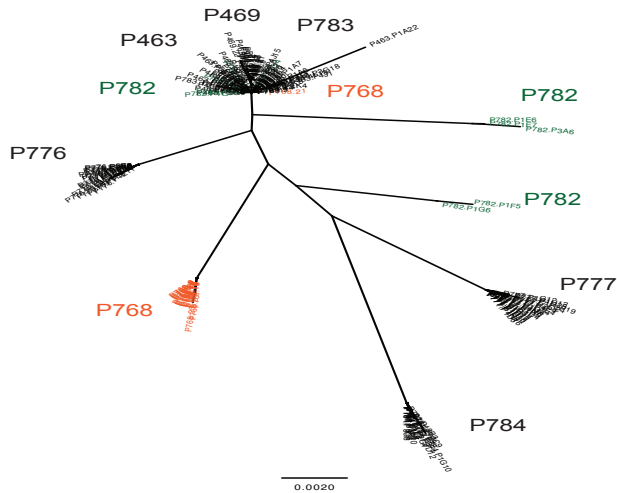

**SUPPLEMENTAL DATA 1: Number of transmitted viral variants** (a) Neighbor joining tree (radial) for ALVAC/HPV+gp120 vaccinated, SIV infected animals. Animals that are infected with a single variant are in black, while animals infected with multiple viral variants are colored. (b) Neighbor joining tree (radial) for HPV+gp120 vaccinated, SIV infected animals. (c) Neighbor joining tree (radial) for control animals that were SIV infected animals

## Supplemental Data 2

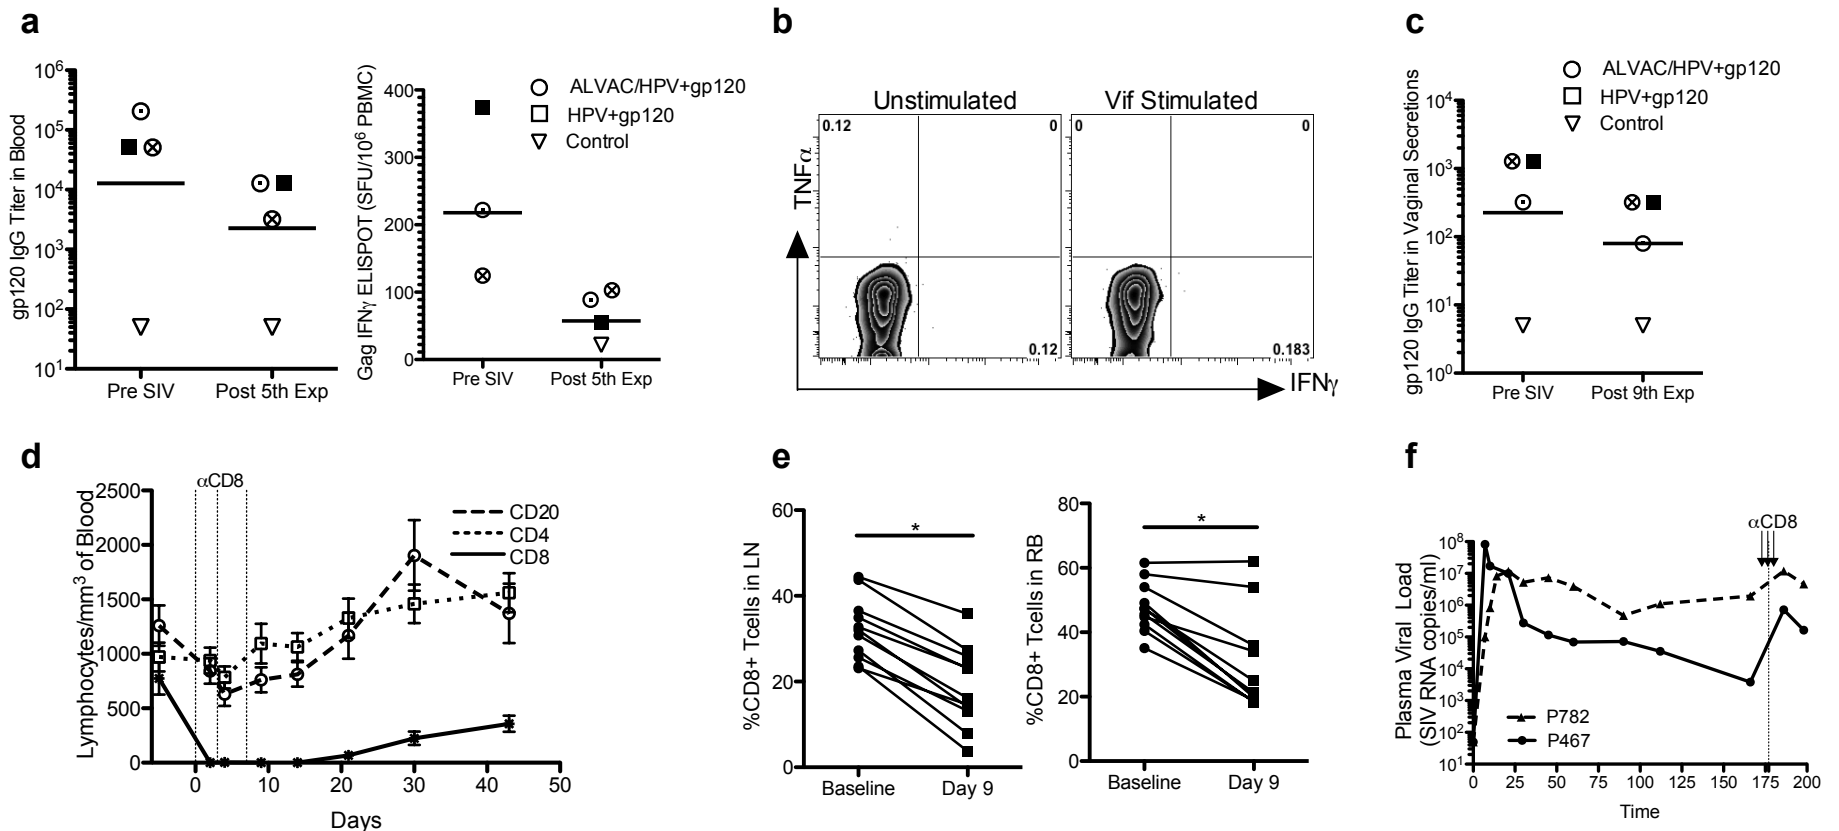

### SUPPLEMENTAL DATA 2: Repeated low dose SIV challenges do not increase SIV-specific responses in animals with transient viremia.

(a) Gp120 specific antibody titers and Gag specific IFN- $\gamma$  ELISPOT responses in blood. Samples were obtained 1-2 weeks before the first SIV challenge (Pre SIV) and during the challenge phase i.e. seven days after the fifth SIV challenge (Post 5<sup>th</sup> Exp). The ALVAC/HPV animals are shown in circles, HPV group squares, and control triangle. (b) After the 9<sup>th</sup> and final intra-vaginal SIV challenge, vaginal biopsies were obtained. Representative flow plots of mononuclear cells obtained from these biopsies that were either left unstimulated (left) or stimulated with overlapping peptides that span Vif (right). Shown is the frequency of IFN- $\gamma$  and TNF- $\alpha$  cytokine production. (c) Gp120 specific binding antibodies in mucosal secretions collected 3 weeks before SIV challenge (Pre SIV) and after the 9<sup>th</sup> low dose SIV challenge (Post 9<sup>th</sup> Exp). (d) Three doses of CD8 depleting antibodies ( $\alpha$ CD8) were administered and the absolute number of CD4 $^+$  T-cells (small dashed line), CD20 $^+$  cells (dashed line), and CD8 $^+$  T-cells (solid line) is shown before and after antibody administration. (e) The frequency of CD8 $^+$  T-cells in the lymph nodes (LN) and rectal pinch biopsies (RB) before CD8 depletion (Baseline) and 9 days post the first antibody administration (Day 9) is shown. A significant reduction in the frequency was observed at Day 9 indicated by \*. A Wilcoxon signed rank test was used to compare the differences, and a p value of 0.001 and 0.002 was obtained for the lymph nodes and rectal biopsies respectively. (f) Viral loads over time of the two persistently SIV infected animals that were CD8 depleted. Arrows indicate time of anti CD8 $^+$  administration.
